# Supplementary material for: Ribosomal and non-ribosomal PCR targets for the detection of low-density and mixed malaria infections
Source: Springer Nature journal article supplement (doi:10.1186/s12936-019-2781-3), 2019-04-30
Supplement: MOESM2 [file 16688240]

**Additional File 2.** Amplification curves of NR-qPCR performed on field samples infected with *P. vivax* (n=3; red), *P. falciparum* (n=3; blue), *P. malariae* (n=3; green), and *P. brasilianum* DNA (n=1; orange). The amplification plots are shown for **(A)** Pvr47 and **(B)** Pfr364 assays.

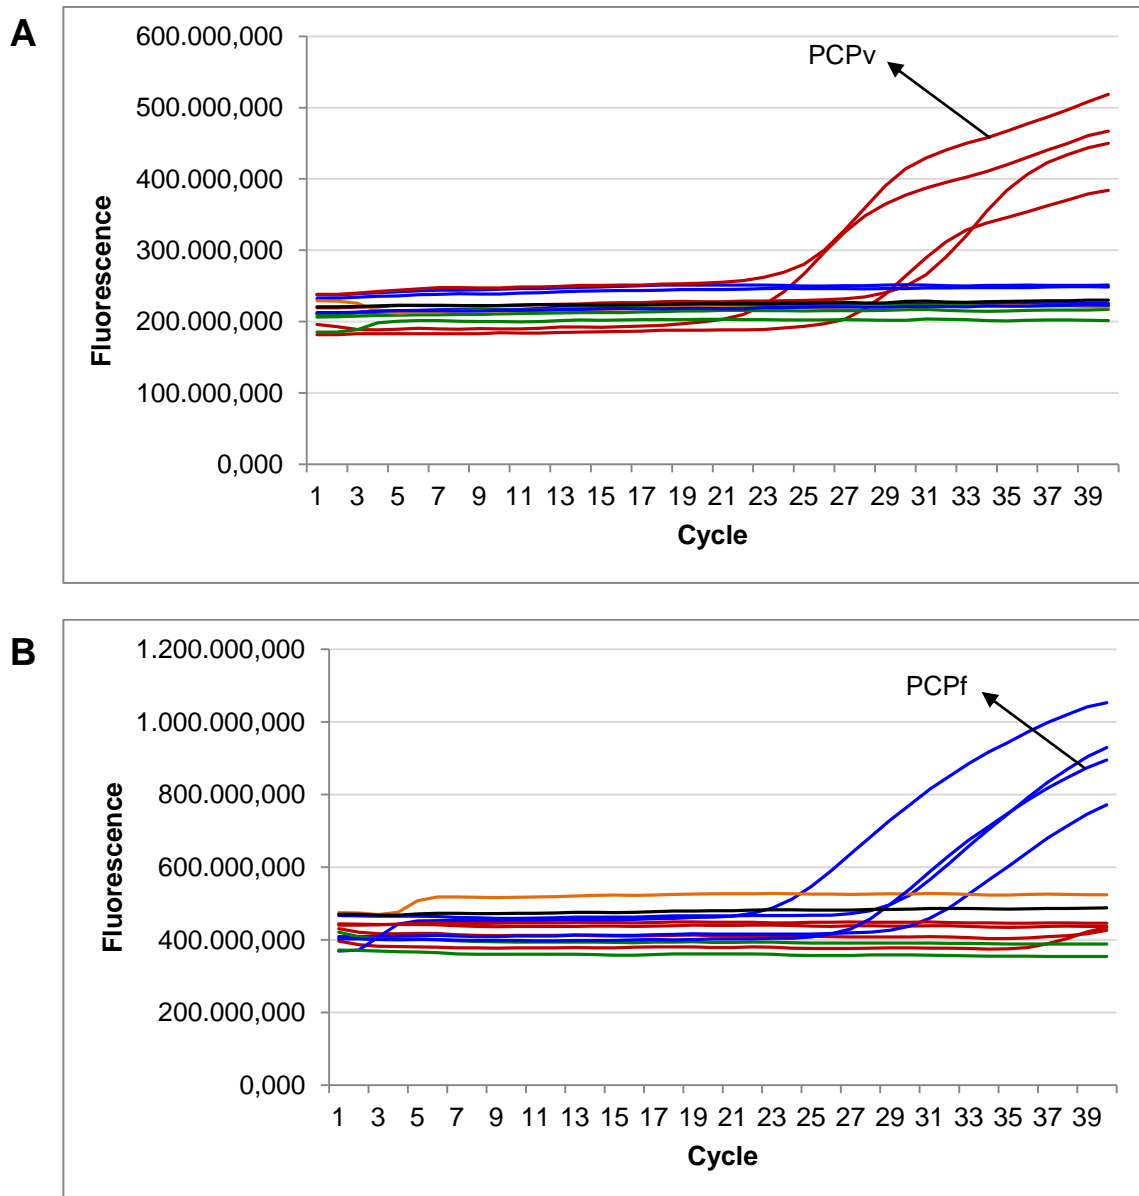

PCPv = positive control of *P. vivax*; PCPf = positive control of *P. falciparum*.
