# Supplementary material for: Ribosomal and non-ribosomal PCR targets for the detection of low-density and mixed malaria infections
Source: Springer Nature journal article supplement (doi:10.1186/s12936-019-2781-3), 2019-04-30
Supplement: MOESM3 [file 16688240]

**Additional File 3.** Five-fold dilution of *P. vivax*-Pvr47 and *P. falciparum*-Pfr364 plasmids amplified by NR-qPCR

| Plasmid | <i>P. vivax</i> -Pvr47       |       |                             |             |
|---------|------------------------------|-------|-----------------------------|-------------|
|         | Positive/n° replicates       |       | Mean C <sub>t</sub> (Ct SD) |             |
|         | Exp 1                        | Exp 2 | Exp 1                       | Exp 2       |
| 20,000  | 3/3                          | NP    | 24.3 (0.04)                 | NP          |
| 4,000   | 3/3                          | NP    | 26.7 (0.07)                 | NP          |
| 800     | 3/3                          | 3/3   | 29.0 (0.03)                 | 29.3 (0.12) |
| 160     | 3/3                          | 3/3   | 31.2 (0.22)                 | 30.9 (0.24) |
| 32      | 5/5                          | 5/5   | 33.0 (1.40)                 | 33.5 (0.26) |
| 6.4     | 5/5                          | 5/5   | 34.9 (0.40)                 | 34.4 (0.60) |
| 1.28    | 5/5                          | 5/5   | 36.8 (1.20)                 | 33.5 (1.28) |
| 0.25    | 3/5                          | 5/5   | 38.0 (0.60)                 | 32.8 (0.60) |
| 0.05    | 2/5                          | 5/5   | 35.5 (1.05)                 | 34.4 (1.13) |
| Plasmid | <i>P. falciparum</i> -Pfr364 |       |                             |             |
|         | Positive/n° replicates       |       | Mean C <sub>t</sub> (Ct SD) |             |
|         | Exp 1                        | Exp 2 | Exp 1                       | Exp 2       |
| 20,000  | 3/3                          | NP    | 23.1 (0.05)                 | NP          |
| 4,000   | 3/3                          | NP    | 25.4 (0.10)                 | NP          |
| 800     | 3/3                          | 3/3   | 27.7 (0.10)                 | 28.3 (0.12) |
| 160     | 3/3                          | 3/3   | 29.9 (0.06)                 | 30.7 (0.42) |
| 32      | 5/5                          | 5/5   | 32.4 (0.40)                 | 32.7 (0.40) |
| 6.4     | 5/5                          | 5/5   | 34.5 (0.60)                 | 34.7 (1.06) |
| 1.28    | 4/5                          | 3/5   | 36.5 (1.00)                 | 36.6 (0.55) |
| 0.25    | 4/5                          | 2/5   | 37.1 (0.20)                 | 36.2 (0.45) |
| 0.05    | 0/5                          | 0/5   | NA                          | NA          |

\*2µL of template DNA were added per PCR reaction. Two independent experiments were performed (Exp 1 and Exp 2), and three to five replicates per dilution point. NP=not performed. NA=not applicable.
