# Supplementary material for: Ribosomal and non-ribosomal PCR targets for the detection of low-density and mixed malaria infections
Source: Springer Nature journal article supplement (doi:10.1186/s12936-019-2781-3), 2019-04-30
Supplement: MOESM4 [file 16688240]

**Additional File 4.** Conditions of the Nested-PCR, R-qPCR, and NR-cPCR assays. The primers/probes used for *P. vivax* and *P. falciparum* targets were the original described. The products of nested-PCR and NR-cPCR were visualized by 2% agarose gel stained with ethidium bromide.

| <b>Target</b>                                           | 18S rRNA                                                                              | 18S rRNA                                       | Pvr47/Pfr364                                    |
|---------------------------------------------------------|---------------------------------------------------------------------------------------|------------------------------------------------|-------------------------------------------------|
| <b>Protocol*</b>                                        | Nested-PCR                                                                            | R-qPCR                                         | NR-cPCR                                         |
| <b>PCR reaction conditions</b>                          |                                                                                       |                                                |                                                 |
| Final volume                                            | 20 µL                                                                                 | 12.5 µL                                        | 10 µL                                           |
| DNA template                                            | 0.8 µL                                                                                | 2 µL                                           | 1 µL                                            |
| Primers (fwd and rev)                                   | 250 nM                                                                                | 200 nM                                         | 500 nM                                          |
| Probe                                                   | -                                                                                     | 80 nM                                          | -                                               |
| 2X PCR Master Mix                                       | 10 µL                                                                                 | -                                              | -                                               |
| Taqman Universal PCR Master Mix 2X (Applied Biosystems) | -                                                                                     | 6.25 µL                                        | -                                               |
| Deoxyribonucleotide triphosphates (dNTP)                | -                                                                                     | -                                              | 125 µM                                          |
| Taq DNA polymerase (Invitrogen)                         | -                                                                                     | -                                              | 0.3 µL                                          |
| 10X Buffer                                              | -                                                                                     | -                                              | 1 µL                                            |
| MgCl <sub>2</sub>                                       | -                                                                                     | -                                              | 0.75 mM                                         |
| <b>PCR cycling conditions</b>                           |                                                                                       |                                                |                                                 |
| Initial step                                            | 95°C – 5 min<br>58°C – 2 min<br>72°C – 2 min                                          | 50°C – 2 min<br>95°C – 10 min                  | 95°C – 2 min                                    |
| Denaturation, annealing and elongation                  | 94°C – 1 min<br>58°C – 2 min<br>72°C – 2 min                                          | 95°C – 15 sec<br>60°C – 1 min                  | 95°C – 30 sec<br>58°C – 30 sec<br>72°C – 45 sec |
| Final extension                                         | 58°C – 2 min<br>72°C – 5 min                                                          | -                                              | 72°C – 5 min                                    |
| Number of cycles                                        | 24**                                                                                  | 45                                             | 35                                              |
| <b>Platform</b>                                         | PTC-100TM v.7.0 (MJ Research Inc, USA) and Veriti Thermal Cycler (Applied Biosystems) | 7500 Real-Time PCR System (Applied Biosystems) | Veriti Thermal Cycler (Applied Biosystems)      |

\*Nested-PCR (14; 20), R-qPCR (15), and NR-qPCR (22).

\*\*The cycling parameters for the second round were the same as the first reaction, but with 29 cycles of amplification.
