# Supplementary material for: Ribosomal and non-ribosomal PCR targets for the detection of low-density and mixed malaria infections
Source: Springer Nature journal article supplement (doi:10.1186/s12936-019-2781-3), 2019-04-30

**Additional File 5.** Limit of detection (LOD) for **(A)** Pvr47 and **(B)** Pfr364 targets amplified by NR-qPCR. Probit regression analysis was used on logarithmic scale using nine points of NR-qPCR standard curves (20,000 to 0.05 copies/ $\mu$ L). The calculated regression curves (blue lines) indicate the probability (y-axis) of obtaining positive results at any template concentration, and dashed brown lines shows 95% confidence intervals. Dashed black lines correspond to the lower DNA concentration in which 95% of positive samples were detected (0.66 copies/ $\mu$ L of Pvr47 and 3.27 copies/ $\mu$ L of Pfr364).

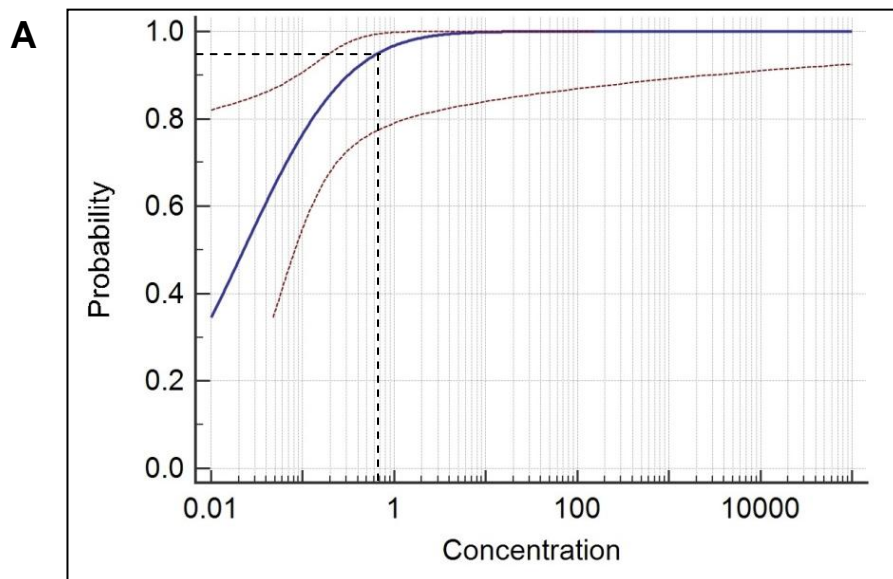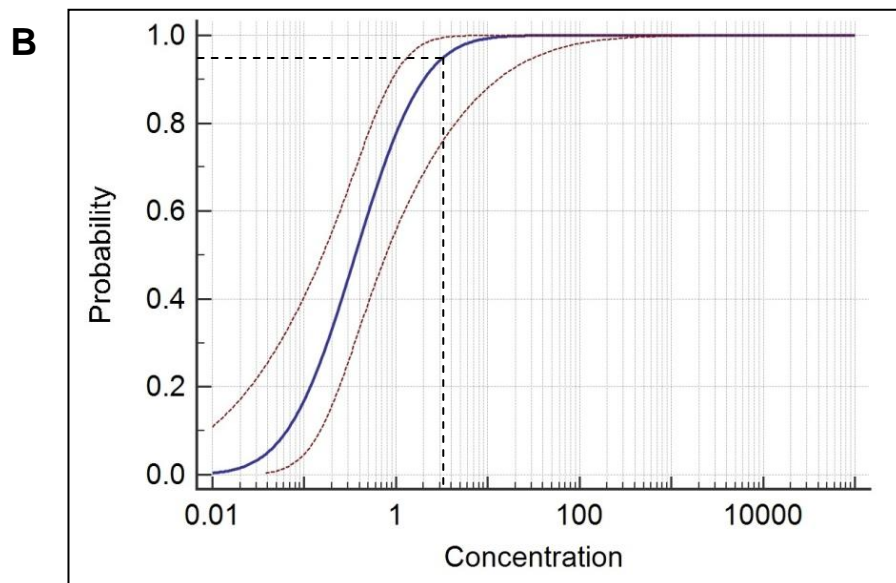

Supplement: MOESM5 [file 16688240]
